# Supplementary material
Source: HighWire-hosted journal article supplement (https://jnm.snmjournals.org/highwire/filestream/94695/field_highwire_adjunct_files/0/148544_Supplemental_data.pdf)
Supplement: 148544_Supplemental_data.pdf [file 148544_Supplemental_data.pdf]

## SUPPLEMENTAL DATA

### SUPPLEMENTAL METHODS

#### Conjugation Of Monoclonal Antibody With Chelator

The antibody in phosphate buffered saline (PBS) was first adjusted to pH 9.2 using 0.07 M sodium borate buffer (Sigma Aldrich). The sample was concentrated using an Amicon Ultra-2 centrifugal filter (2 mL, 100 K, Millipore). The chelator CHX-A''-DTPA, dissolved in borate buffer, was added to the protein solution in a molar ratio of 3:1 chelator to antibody, and the mixture was incubated with gentle shaking at 40°C (1). The reaction was terminated after 4 h, and the conjugates, from now on called DTPA-m11B6 or DTPA-h11B6, were separated from free chelator by size-exclusion chromatography on a NAP-5 column (GE Healthcare) equilibrated with 20 mL 0.2 M ammonium acetate buffer, pH 5.5 (Sigma Aldrich). Conjugated 11B6 was eluted with 1 mL ammonium acetate buffer (Sigma Aldrich) and was stored at -20°C.

#### Radiolabeling

Radiolabeling was accomplished by mixing, typically 150 µL of conjugated 11B6 (~1 µg/µL in 0.2 M ammonium acetate buffer, pH 5.5) with a predetermined amount (~150–200 MBq) of <sup>177</sup>LuCl<sub>3</sub> (IDB Petten BV), and adjusted to a total volume of 500 µL. After incubation at room temperature for 2 h, the labeling was terminated, and the mixture was purified on a NAP-5 column equilibrated with PBS (Thermo Scientific). Labeling efficiency and labeling kinetics were monitored with instant thin-layer chromatography strips, eluted with 0.2 M citric acid (Sigma Aldrich). The radioactivity distribution was determined with a PhosphorImager system using Optiquant as the quantification software (Perkin Elmer).

## Cell Line

LNCaP (hK2+) cells were purchased from American Type Culture Collection. Cells (ATCC) were cultured in RPMI 1640 medium (Thermo Scientific) supplemented with 10% fetal bovine serum (Thermo Scientific) with 100 IU/mL penicillin and 100 µg/mL streptomycin (Thermo Scientific). The cells were maintained at 37°C in a humidified incubator at 5% CO<sub>2</sub> and were detached with trypsin-EDTA solution (Thermo Scientific).

## Intensity calibration of optical imaging system

The imaging system was intensity-calibrated using a Tungsten light source (OceanOptics LS-1, Dunedin, FL, USA) connected to a fiber patch cord. A fiber tip with a known diameter and numerical aperture was imaged using the camera setup. The power emitted from the fiber tip within a known spectral interval was measured using a power meter (Ophir Nova II, Ophir, Israel). Using these measurements, the radiance emitted from the fiber tip could be calculated. A calibration coefficient that relates the camera counts (ADU) to radiance was then retrieved from the image of the fiber tip.

**Supplemental Table 1. Experimental details for the different animal groups**

| Gro up | Strain    | n | Radioimmuno-conjugate   | Administered Activity (MBq) | CLI time points (h p.i.) | SPECT time points (h p.i.) |
|--------|-----------|---|-------------------------|-----------------------------|--------------------------|----------------------------|
| 1      | Balb/c-nu | 2 | <sup>177</sup> Lu-m11B6 | 20                          | 24,48,72,168,264,336     | 24,48,72,168,264,336       |
| 1      | NMRI-nu   | 3 | <sup>177</sup> Lu-m11B6 | 20                          | 24,48,72                 | 24,48,72                   |
| 2      | Balb/c-nu | 4 | <sup>177</sup> Lu-h11B6 | 20                          | 24,48,72,168,            | NA                         |

## SUPPLEMENTAL RESULTS

### Tumor Response Monitoring Using CLI

A representative plot of the CLI radiance, normalized with the tumor weight, is plotted against time p.i. in Supplemental Figure 1. The shaded area in Supplemental Figure 1 represents the AUC.

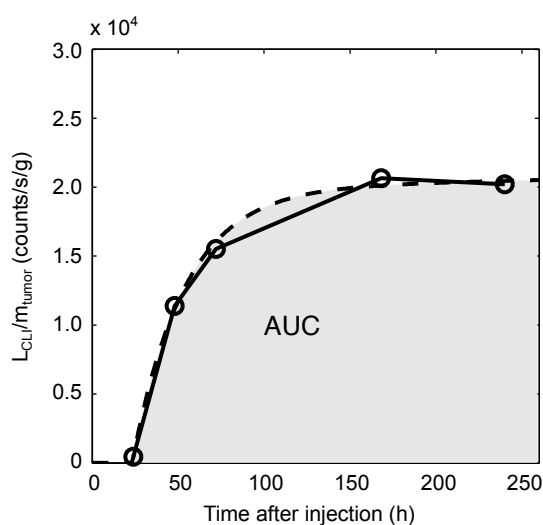

**Supplemental Figure 1:** A representative plot of the CLI radiance normalized with the tumor weight. The shaded area represents the area-under-curve (AUC).

## SUPPLEMENTAL REFERENCES

1. Tolmachev V, Wallberg H, Andersson K, Wennborg A, Lundqvist H, Orlova A. The influence of Bz-DOTA and CHX-A''-DTPA on the biodistribution of ABD-fused anti-HER2 Affibody molecules: implications for  $(^{114m})\text{In}$ -mediated targeting therapy. *Eur J Nucl Med Mol Imaging*. 2009;36:1460-1468.
